# Supplementary material for: The Role of Risk or Contributory Death Factors in Methadone-Related Fatalities: A Review and Pooled Analysis
Source: PubMed Central journal article supplement (PMC8004630; doi:10.3390/metabo11030189), 2021-03-22
Supplement: metabolites-11-00189-s001.pdf [file metabolites-11-00189-s001.pdf]

**Figure S1.** Prisma flow-chart of papers and cases selection from the literature and from the in house casuistry.

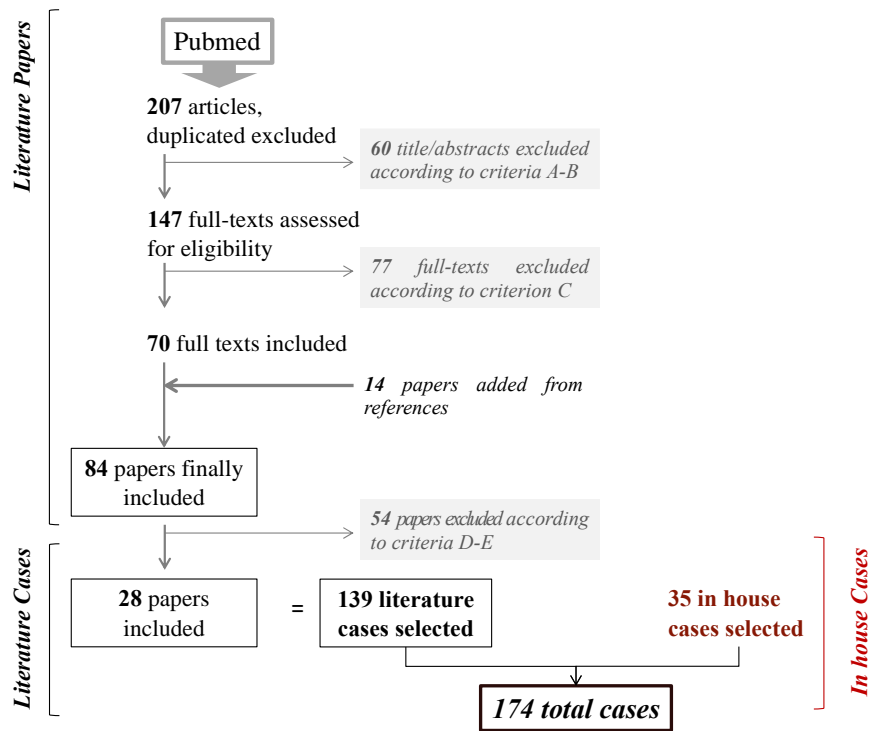

**Table S1.** Literature review – Included papers

| Ref.. | Authors            | Title                                                                                                                                                | Year | Type of article           | Journal                                                 |
|-------|--------------------|------------------------------------------------------------------------------------------------------------------------------------------------------|------|---------------------------|---------------------------------------------------------|
| [90]  | Akhgari et al.     | Forensic toxicology perspectives of methadone-associated deaths in Tehran, Iran, a 7-year Overview                                                   | 2018 | Retrospective case series | Basic & Clinical Pharmacology & Toxicology              |
| [39]  | Albion et al.      | Contributing factors to methadone-related deaths in Ontario                                                                                          | 2010 | Retrospective case series | The American journal of forensic medicine and pathology |
| [40]  | Andersson et al.   | Investigating opioid-related fatalities in Southern Sweden: contact with care-providing authorities and comparison of substances                     | 2020 | Retrospective case series | Harm Reduction Journal                                  |
| [41]  | Argo et al.        | A possible biomarker for methadone related deaths                                                                                                    | 2017 | Original article          | Journal of Forensic and Legal Medicine                  |
| [42]  | Aromatario et al.  | Methadone related deaths: identifying the vulnerable patients                                                                                        | 2013 | Case report               | Journal of Forensic Toxicology and Pharmacol            |
| [86]  | Ballesteros et al. | Increase in Deaths Due to Methadone in North Carolina                                                                                                | 2003 | Retrospective case series | JAMA                                                    |
| [16]  | Bell et al.        | Comparing overdose mortality associated with methadone and buprenorphine treatment                                                                   | 2009 | Retrospective case series | Drug and Alcohol Dependence                             |
| [18]  | Bernard et al.     | Methadone-related deaths in Norway                                                                                                                   | 2013 | Retrospective case series | Forensic Science International                          |
| [109] | Bernard et al.     | Characteristics of methadone-related fatalities in Norway                                                                                            | 2015 | Retrospective case series | Journal of Forensic and Legal medicine                  |
| [43]  | Bonsignore et al.  | Fatal methadone intoxication in an infant listed as a homicide                                                                                       | 2016 | Case report               | International Journal of Legal Medicine                 |
| [78]  | Bryant et al.      | Overdose deaths attributed to methadone and heroin in New York City, 1990–1998                                                                       | 2003 | Retrospective case series | Addiction                                               |
| [110] | Buchard et al.     | Postmortem blood concentrations of R- and S-enantiomers of methadone and EDDP in drug users: influence of co-medication and p-glycoprotein genotype. | 2010 | Original article          | Journal of Forensic Sciences                            |
| [44]  | Buster et al.      | An increase in overdose mortality during the first 2 weeks after entering or re-entering methadone treatment in Amsterdam                            | 2002 | Retrospective case series | Addiction                                               |
| [101] | Byard et al.       | Diabetic ketoacidosis – a possible complicating factor in deaths associated with drug overdose                                                       |      | Case report               | Medicine, Science and the Law                           |
| [45]  | Caplehorn et al.   | Fatal methadone toxicity: signs and circumstances, and the role of benzodiazepines                                                                   | 2002 | Retrospective case series | Australian and New Zealand journal of public health     |
| [74]  | Caplehorn et al.   | Methadone dose and post-mortem blood concentration                                                                                                   | 2002 | Retrospective case series | Drug and Alcohol Review                                 |

|       |                   |                                                                                                                           |      |                           |                                                     |
|-------|-------------------|---------------------------------------------------------------------------------------------------------------------------|------|---------------------------|-----------------------------------------------------|
| [98]  | Carson et al.     | Identification at autopsy of pulverized pills in lungs of a first-time methadone user                                     | 2009 | Case report               | Journal of Forensic and Legal Medicine              |
| [32]  | Chugh et al.      | A community-based evaluation of sudden death associated with therapeutic levels of methadone                              | 2008 | Prospective case series   | Am J Med.                                           |
| [23]  | Corkery et al.    | The effects of methadone and its role in fatalities                                                                       | 2004 | Review                    | Human Psychopharmacology                            |
| [46]  | Couper et al.     | Fatal methadone intoxication in an infant                                                                                 | 2005 | Case report               | Forensic Science International                      |
| [89]  | Dai et al.        | Quantifying enhanced risk from alcohol and other factors in polysubstance-related deaths                                  | 2020 | Retrospective case series | Forensic Science International                      |
| [47]  | Darke et al.      | The comparative toxicology and major organ pathology of fatal methadone and heroin toxicity cases                         | 2010 | Retrospective case series | Drug and Alcohol Dependence                         |
| [102] | Drummer et al.    | Recent Trends in Narcotic Deaths                                                                                          | 2005 | Review                    | Therapeutic Drug Monitoring                         |
| [97]  | Eiden et al.      | Methadone-related deaths in Montpellier and Region, from 2000 to 2010                                                     | 2012 | Retrospective case series | Therapie                                            |
| [81]  | Ernst et al.      | Methadone-related deaths in Western Australia 1993-99                                                                     | 2002 | Retrospective case series | Australian and New Zealand Journal of Public Health |
| [106] | Fahey et al.      | Sudden death in an adult taking methadone: lessons for general practice                                                   | 2003 | Case report               | British Journal of General Practice                 |
| [77]  | Fiddler et al.    | A review of GP records relating to methadone-associated deaths in the Lothian region of Scotland 1997-9.                  | 2001 | Retrospective case series | Journal of Substance Use                            |
| [48]  | Fields et al.     | Parent and metabolite opioid drug concentrations in unintentional deaths involving opioid and benzodiazepine combinations | 2015 | Retrospective case series | Journal of forensic sciences                        |
| [80]  | Fugelstad et al.  | Methadone maintenance treatment: the balance between life-saving treatment and fatal poisonings                           | 2007 | Retrospective case series | Addiction                                           |
| [87]  | Fugelstad et al.  | Methadone-related deaths among youth and young adults in Sweden 2006-15                                                   | 2020 | Retrospective case series | Addiction                                           |
| [38]  | Gagajewski et al. | Methadone-related deaths in Hennepin County, Minnesota: 1992-2002                                                         | 2003 | Retrospective case series | Journal of Forensic Sciences                        |
| [49]  | Gao et al.        | Risk-factors for methadone-specific deaths in Scotland's methadone-prescription clients between 2009 and 2013             | 2016 | Retrospective case series | Drug and Alcohol Dependence                         |
| [91]  | Gharehdaghi       | Suspected methadone toxicity: from hospital to autopsy bed                                                                | 2013 | Retrospective case series | Basic & Clinical Pharmacology & Toxicology          |

|       |                         |                                                                                                                                              |      |                           |                                                     |
|-------|-------------------------|----------------------------------------------------------------------------------------------------------------------------------------------|------|---------------------------|-----------------------------------------------------|
| [83]  | Graham et al.           | Methadone- and heroin-related deaths in Florida                                                                                              | 2008 | Retrospective case series | The American Journal of Drug and Alcohol Abuse      |
| [108] | Grass et al.            | Methadone and its role in drug-related fatalities in Cologne 1989–2000                                                                       | 2003 | Retrospective case series | Forensic Science International                      |
| [84]  | Green et al.            | Methadone maintenance programs-a two-edged sword?                                                                                            | 2001 | Retrospective case series | American Journal of Forensic Medicine & Pathology   |
| [50]  | Häkkinen et al.         | Comparison of fatal poisonings by prescription opioids                                                                                       | 2012 | Retrospective case series | Forensic Science International                      |
| [95]  | Häkkinen et al.         | Prescription opioid abuse based on representative postmortem toxicology                                                                      | 2014 | Retrospective case series | Forensic Science International                      |
| [72]  | Heinemann et al.        | Methadone-related fatalities in Hamburg 1990–1999: implications for quality standards in maintenance treatment?                              | 2000 | Retrospective case series | Forensic Science International                      |
| [51]  | Holm et al.             | Distribution of enantiomers of methadone and its main metabolite EDDP in human tissues and blood of postmortem cases                         | 2015 | Original article          | Journal of forensic sciences                        |
| [34]  | Iwersen-Bergmann et al. | Intravenous methadone application as a serious risk factor for an overdose death: methadone-related fatalities in Hamburg from 2007 to 2012  | 2014 | Retrospective case series | International Journal of Legal Medicine             |
| [79]  | Jones et al.            | Blood methadone concentrations in living and deceased persons: variations over time, subject demographics, and relevance of coingested drugs | 2012 | Retrospective case series | Journal of Analytical Toxicology                    |
| [104] | Karlovsek               | Illegal drugs-related fatalities in Slovenia                                                                                                 | 2004 | Retrospective case series | Forensic Science International                      |
| [52]  | Kintz et al.            | Methadone as a chemical weapon: two fatal cases involving babies                                                                             | 2005 | Case report               | Therapeutic Drug Monitoring                         |
| [53]  | Laberke et al.          | Trends in methadone-related deaths in Zurich                                                                                                 | 2010 | Retrospective case series | International Journal of Legal Medicine             |
| [93]  | Lev et al.              | Methadone related deaths compared to all prescription related deaths                                                                         | 2015 | Retrospective case series | Forensic Science International                      |
| [54]  | Li et al.               | Fatal methadone poisoning in children: Maryland 1992-1996                                                                                    | 2009 | Retrospective case series | Substance Use & Misuse                              |
| [92]  | Lusetti et al.          | Therapeutic and recreational methadone cardiotoxicity                                                                                        | 2016 | Retrospective case series | Journal of Forensic and Legal Medicine              |
| [55]  | Madden et al.           | The methadone epidemic: methadone-related deaths on the rise in Vermont                                                                      | 2011 | Retrospective case series | American journal of forensic medicine and pathology |
| [56]  | Mijatović et al.        | Methadone-related deaths – epidemiological, pathohistological, and toxicological traits in 10-year retrospective study in Vojvodina, Serbia. | 2014 | Retrospective case series | Journal of forensic sciences                        |
| [107] | Mikolaenko et al.       | A review of methadone deaths in Jefferson County, Alabama                                                                                    | 2002 | Retrospective case series | American journal of forensic medicine and pathology |

|       |                     |                                                                                                                                                                     |      |                           |                                         |
|-------|---------------------|---------------------------------------------------------------------------------------------------------------------------------------------------------------------|------|---------------------------|-----------------------------------------|
| [33]  | Milroy et al.       | Methadone deaths: a toxicological analysis                                                                                                                          | 2000 | Retrospective case series | Journal of clinical pathology           |
| [57]  | Mistry et al.       | Methadone toxicity in infants: a report of two fatalities                                                                                                           | 2010 | Case report               | Forensic Science Medicine and Pathology |
| [36]  | Musshoff et al.     | Methadone substitution: medicolegal problems in Germany                                                                                                             | 2003 | Retrospective case series | Forensic Science International          |
| [28]  | Nielsen et al.      | Evaluation of poly-drug use in methadone-related fatalities using segmental hair analysis                                                                           | 2015 | Retrospective case series | Forensic Science International          |
| [58]  | Nielsen et al.      | Evaluation of metabolite/drug ratios in blood and urine as a tool for confirmation of a reduced tolerance in methadone-related deaths in Denmark                    | 2013 | Retrospective case series | Drug and Alcohol Dependence             |
| [59]  | Okic et al.         | Opioid overdose mortality in Kansas, 2001-2011: toxicologic evaluation of intent                                                                                    | 2013 | Retrospective case series | Journal of analytical toxicology        |
| [60]  | Palmiere et al.     | An unusual case of accidental poisoning: fatal methadone inhalation                                                                                                 | 2011 | Case report               | Journal of Forensic Sciences            |
| [61]  | Palmiere et al.     | Parental substance abuse and accidental death in children                                                                                                           | 2010 | Case report               | Journal of Forensic Sciences            |
| [62]  | Paulozzi et al.     | A comparison of drug overdose deaths involving methadone and other opioid analgesics in West Virginia                                                               | 2009 | Retrospective case series | Addiction                               |
| [63]  | Perret et al.       | Lethal methadone intoxications in Geneva, Switzerland, from 1994 to 1998                                                                                            | 2000 | Retrospective case series | Addiction                               |
| [94]  | Petrushevska et al. | Drug-related deaths between 2002 and 2013 with accent to methadone and benzodiazepines                                                                              | 2015 | Retrospective case series | Journal of Forensic and Legal Medicine  |
| [35]  | Pilgrim et al.      | A review of methadone deaths between 2001 and 2005 in Victoria, Australia                                                                                           | 2013 | Retrospective case series | Forensic Science International          |
| [105] | Pirnay et al.       | A critical review of the causes of death among post-mortem toxicological investigations: analysis of 34 buprenorphine-associated and 35 methadone-associated deaths | 2004 | Retrospective case series | Addiction                               |
| [76]  | Seymour et al.      | The role of methadone in drug-related deaths in the west of Scotland                                                                                                | 2003 | Retrospective case series | Addiction                               |
| [64]  | Shields et al.      | Methadone toxicity fatalities: a review of medical examiner cases in a large metropolitan area                                                                      | 2007 | Retrospective case series | Journal of forensic sciences            |
| [65]  | Simonsen et al.     | Fatal poisoning among patients with drug addiction                                                                                                                  | 2015 | Retrospective case series | Danish medical journal                  |
| [66]  | Simonsen et al.     | Fatal poisoning in drug addicts in the Nordic Countries in 2012                                                                                                     | 2015 | Retrospective case series | Forensic Science International          |
| [67]  | Sorg et al.         | Additive effects of cointoxicants in single-opioid induced deaths                                                                                                   | 2016 | Retrospective case series | Academic Forensic Pathology             |
| [100] | Soyka et al.        | Fatal poisoning in methadone and buprenorphine treated patients -- are there differences?                                                                           | 2006 | Retrospective case series | Pharmacopsychiatry                      |

|       |                         |                                                                                                                                 |      |                           |                                          |
|-------|-------------------------|---------------------------------------------------------------------------------------------------------------------------------|------|---------------------------|------------------------------------------|
| [103] | Stentoft et al.         | Fatal poisoning in Nordic drug addicts in 2002                                                                                  | 2006 | Retrospective case series | Forensic Science International           |
| [68]  | Sutlovic et al.         | Methadone maintenance treatment: a 15-year retrospective study in split-Dalmatia County, Croatia                                | 2018 | Retrospective case series | Therapeutic Drug Monitoring              |
| [19]  | Tjagvad et al.          | Methadone-related overdose deaths in a liberal opioid maintenance treatment programme                                           | 2016 | Retrospective case series | European Addiction Research              |
| [96]  | Tormey et al.           | Methadone, codeine and acute haemorrhagic necrotising pancreatitis: which came first?                                           | 2013 | Case report               | Forensic Science International           |
| [75]  | Valmana et al.          | Methadone-related deaths: data from 18 coroners' jurisdictions in England                                                       | 2000 | Retrospective case series | Medicine Science and the Law             |
| [88]  | Van Den Broecke et al.  | Methadone-related fatalities: review in the Ghent district between 1978-2008                                                    | 2012 | Retrospective case series | Acta Clinica Belgica                     |
| [99]  | Verhoek-Oftedahl et al. | Drug intoxication deaths involving methadone, 2004-2005                                                                         | 2007 | Retrospective case series | Medicine and health, Rhode Island        |
| [69]  | Vignali et al.          | Methadone-related deaths. A ten year overview                                                                                   | 2015 | Retrospective case series | Forensic Science International           |
| [73]  | Vormfelde et al.        | Death attributed to methadone                                                                                                   | 2001 | Review                    | Pharmacopsychiatry                       |
| [85]  | Wagner-Servais          | Methadone-related deaths associated with faulty induction procedures                                                            | 2003 | Retrospective case series | Journal of Maintenance in the Addictions |
| [70]  | Wikner et al.           | Opioid-related mortality and filled prescriptions for buprenorphine and methadone                                               | 2014 | Retrospective case series | Drug and alcohol review                  |
| [71]  | Wolf et al.             | Methadone-related deaths in Palm Beach County                                                                                   | 2004 | Retrospective case series | Journal of Forensic Sciences             |
| [37]  | Wolff                   | Characterization of methadone overdose: clinical considerations and the scientific evidence                                     | 2002 | Review                    | Therapeutic Drug Monitoring              |
| [82]  | Wunsch et al.           | Opioid deaths in Rural Virginia: a description of the high prevalence of accidental fatalities involving prescribed medications | 2009 | Retrospective case series | American Journal on Addictions           |

**Table S2.** Literature cases, with extracted data and classification.

Ref: references

Gender. F: female, M: male.

Post-mortem examination. H: heart; L: lung.

neg: not detected in blood; np: data not provided.

6-MAM: 6-monoacetylmorphine; BEG: benzoylecgonine; BZDs: benzodiazepine

Other drugs. THC: tetrahydrocannabinol; THC-COOH: tetrahydrocannabinolic acid.

D: drugs; N: naïve/non-tolerant; P: pulmonary; C: cardiac.

CN: controls. CA: cases

| Ref. | Age (yo) | Gender | Naive/non tolerant | Post-mortem examination                                                                                                                                                   | Methodone (ng/mL) | 6-MAM | Morphine | Codeine | Cocaine | BEG | BZDs | Other drugs | Disease or condition | Group |
|------|----------|--------|--------------------|---------------------------------------------------------------------------------------------------------------------------------------------------------------------------|-------------------|-------|----------|---------|---------|-----|------|-------------|----------------------|-------|
| [41] | 37       | M      | No                 | H: interstitial fibrosis, concentric left ventricular hypertrophy, critical three-vessel coronary artery stenosis<br>L: hemorrhagic edema, chronic lymphocytic bronchitis | 270               | neg   | neg      | neg     | neg     | neg | neg  | neg         | P, C                 | CA    |
|      | 42       | M      | No                 | H: enlargement, myocyte hypertrophy; endocardial fibrosis. fibro-lipomatous infiltration<br>L: hemorrhagic edema, acute bronchopneumonia                                  | 610               | neg   | neg      | neg     | neg     | neg | neg  | neg         | C                    | CA    |
|      | 20       | M      | No                 | H: enlargement, myocyte hypertrophy, contraction band necrosis<br>L: hemorrhagic edema                                                                                    | 370               | neg   | neg      | neg     | neg     | neg | neg  | neg         | C                    | CA    |
|      | 35       | M      | No                 | H: left ventricular chamber dilatation, pace-maker<br>L: edema, emphysema, granulomatous inflammation                                                                     | 890               | neg   | neg      | neg     | neg     | neg | neg  | neg         | C                    | CA    |
|      | 35       | M      | No                 | H: concentric hypertrophy of the left ventricle, signs of myocardial suffering<br>L: chronic bronchitis, alveolar edema                                                   | 720               | neg   | neg      | neg     | neg     | neg | neg  | neg         | P, C                 | CA    |

|      |    |   |     |                                                                                                                                                       |      |     |     |     |     |     |                                |                                      |      |    |
|------|----|---|-----|-------------------------------------------------------------------------------------------------------------------------------------------------------|------|-----|-----|-----|-----|-----|--------------------------------|--------------------------------------|------|----|
|      | 25 | F | No  | L: hemorrhagic edema                                                                                                                                  | 900  | neg | neg | neg | neg | neg | neg                            | neg                                  | -    | CN |
|      | 39 | M | No  | H: myocyte hypertrophy associated with mild perivascular fibrosis<br>L: hemorrhagic edema, panlobular emphysema with fibrotic thickening of the septa | 580  | neg | neg | neg | neg | neg | neg                            | neg                                  | P    | CA |
|      | 19 | F | No  | H: myocytolysis, contraction band necrosis, lipomatous infiltration of the right ventricle<br>L: hemorrhagic edema                                    | 270  | neg | neg | neg | neg | neg | neg                            | neg                                  | C    | CA |
|      | 25 | F | No  | L: hemorrhagic edema                                                                                                                                  | 380  | neg | neg | neg | neg | neg | neg                            | neg                                  | -    | CN |
|      | 25 | M | No  | H: myocyte hypertrophy<br>L: hemorrhagic edema, chronic lymphocytic bronchitis                                                                        | 530  | neg | neg | neg | neg | neg | neg                            | neg                                  | P    | CA |
| [43] | 2  | M | No  | H: aortic coartation and left ventricular hypertrophy<br>L: congestion                                                                                | 633  | neg | neg | neg | neg | neg | neg                            | neg                                  | C    | CA |
| [54] | 4  | M | Yes | L: edema, congestion                                                                                                                                  | 600  | neg | neg | neg | neg | neg | neg                            | neg                                  | N    | CA |
|      | 5  | F | Yes | L: edema                                                                                                                                              | 600  | neg | neg | neg | neg | neg | neg                            | neg                                  | N    | CA |
|      | 3  | M | Yes | NP                                                                                                                                                    | 400  | neg | neg | neg | neg | neg | neg                            | neg                                  | N    | CA |
| [69] | 39 | M | Yes | NP                                                                                                                                                    | 470  | neg | neg | neg | neg | neg | Delorazepam                    | neg                                  | N, D | CA |
|      | 27 | M | Yes | NP                                                                                                                                                    | 210  | neg | neg | neg | neg | neg | Diazepam<br>Nordiazepam        | neg                                  | N, D | CA |
|      | 39 | F | Yes | NP                                                                                                                                                    | 1380 | neg | neg | neg | neg | neg | 7-aminoclonazepam<br>Lorazepam | Venlafaxine                          | N, D | CA |
|      | 25 | M | Yes | NP                                                                                                                                                    | 1080 | neg | neg | neg | neg | neg |                                | Citalopram                           | N, D | CA |
|      | 22 | M | No  | NP                                                                                                                                                    | 520  | neg | neg | neg | pos | pos | neg                            | neg                                  | D    | CA |
|      | 40 | F | No  | NP                                                                                                                                                    | 490  | neg | neg | neg | neg | neg | neg                            | Ethanol<br>Venlafaxine<br>Quetiapine | D    | CA |
|      | 2  | F | Yes | NP                                                                                                                                                    | 200  | neg | neg | neg | neg | neg | neg                            | neg                                  | N    | CA |
|      | 33 | M | No  | NP                                                                                                                                                    | 210  | neg | neg | neg | neg | neg | neg                            | Etha                                 | D    | CA |
|      | 32 | M | No  | NP                                                                                                                                                    | 620  | neg | neg | neg | neg | neg | neg                            | neg                                  | -    | CN |
|      | 28 | M | No  | NP                                                                                                                                                    | 390  | neg | neg | neg | neg | neg | neg                            | Ethanol                              | D    | CA |
|      | 38 | M | No  | NP                                                                                                                                                    | 3150 | neg | neg | neg | neg | neg | neg                            | neg                                  | -    | CN |
|      | 29 | M | No  | NP                                                                                                                                                    | 1460 | neg | neg | neg | neg | neg | neg                            | neg                                  | -    | CN |



|    |   |    |    |      |     |     |     |     |     |                            |                                          |   |    |
|----|---|----|----|------|-----|-----|-----|-----|-----|----------------------------|------------------------------------------|---|----|
| 16 | F | No | NP | 690  | neg | neg | neg | neg | pos | neg                        | neg                                      | D | CA |
| 41 | M | No | NP | 640  | neg | neg | neg | neg | neg | neg                        | Mirtazapine                              | D | CA |
| 26 | M | No | NP | 520  | neg | neg | neg | neg | pos | neg                        | neg                                      | D | CA |
| 2  | M | No | NP | 630  | neg | neg | neg | neg | neg | neg                        | neg                                      | - | CN |
| 39 | F | No | NP | 980  | neg | neg | neg | neg | neg | Lorazepam                  | neg                                      | D | CA |
| 39 | M | No | NP | 340  | neg | neg | neg | neg | neg | neg                        | neg                                      | - | CN |
| 36 | M | No | NP | 480  | neg | neg | neg | neg | neg | neg                        | Ethanol                                  | D | CA |
| 43 | M | No | NP | 1300 | neg | neg | neg | neg | neg | neg                        | Ethanol<br>Citalopram<br>Levomepromazine | D | CA |
| 24 | M | No | NP | 500  | neg | neg | neg | neg | pos | neg                        | Ethanol                                  | D | CA |
| 54 | F | No | NP | 980  | neg | neg | neg | neg | neg | neg                        | neg                                      | - | CN |
| 49 | F | No | NP | 3370 | neg | neg | neg | neg | neg | Desalkylflurazepam         | Ethanol                                  | D | CA |
| 42 | M | No | NP | 1060 | neg | neg | neg | neg | neg | neg                        | Ethanol<br>Promazine                     | D | CA |
| 33 | M | No | NP | 970  | neg | neg | neg | neg | neg | neg                        | neg                                      | - | CN |
| 34 | M | No | NP | 920  | neg | neg | neg | pos | pos | neg                        | Ethanol<br>Citalopram                    | D | CA |
| 26 | M | No | NP | 590  | neg | pos | neg | pos | pos | neg                        | Ethanol                                  | D | CA |
| 30 | M | No | NP | 630  | neg | neg | neg | neg | neg | neg                        | Ethanol<br>Venlafaxine                   | D | CA |
| 42 | M | No | NP | 380  | neg | neg | neg | neg | neg | Nordiazepam<br>Delorazepam | Prometazine<br>Levomepromazine           | D | CA |
| 29 | M | No | NP | 130  | neg | neg | neg | neg | pos | neg                        | Ethanol                                  | D | CA |
| 40 | F | No | NP | 1090 | neg | neg | neg | neg | neg | neg                        | neg                                      | - | CN |
| 44 | M | No | NP | 1190 | neg | neg | neg | neg | neg | neg                        | Citalopram                               | D | CA |
| 43 | M | No | NP | 1500 | neg | neg | neg | neg | pos | neg                        | neg                                      | D | CA |
| 45 | M | No | NP | 2050 | neg | neg | neg | neg | neg | neg                        | Sertraline                               | D | CA |
| 45 | F | No | NP | 1270 | neg | neg | neg | neg | neg | Diazepam<br>Nordazepam     | neg                                      | D | CA |
| 33 | M | No | NP | 1380 | neg | neg | neg | neg | pos | neg                        | Levomepromazine                          | D | CA |

|      |    |    |     |                                                                                                                   |      |     |     |     |     |                         |                                                  |                                                     |      |    |
|------|----|----|-----|-------------------------------------------------------------------------------------------------------------------|------|-----|-----|-----|-----|-------------------------|--------------------------------------------------|-----------------------------------------------------|------|----|
| [60] | 40 | M  | Yes | L: edema, congestion, alveolar and interstitial inflammation, desquamation of the ciliated respiratory epithelium | 290  | neg | neg | neg | neg | neg                     | neg                                              | neg                                                 | N, P | CA |
| [61] | 1  | F  | Yes | L: edema, congestion                                                                                              | 1200 | neg | neg | neg | neg | neg                     | neg                                              | neg                                                 | N    | CA |
| [34] | 26 | M  | Yes | NP                                                                                                                | 260  | neg | neg | neg | neg | neg                     | Diazepam<br>Nordiazepam                          | Ethanol                                             | N, D | CA |
|      | 34 | M  | No  | NP                                                                                                                | 350  | neg | pos | pos | neg | neg                     | neg                                              | neg                                                 | D    | CA |
|      | 17 | F  | No  | NP                                                                                                                | 350  | neg | pos | pos | pos | pos                     | neg                                              | neg                                                 | D    | CA |
|      | 26 | M  | No  | NP                                                                                                                | 400  | neg | pos | neg | neg | neg                     | Diazepam<br>Nordiazepam<br>Oxazepam              | neg                                                 | D    | CA |
|      | 42 | M  | No  | NP                                                                                                                | 580  | neg | pos | neg | neg | neg                     | Diazepam<br>Nordiazepam<br>Oxazepam              | neg                                                 | D    | CA |
|      | 40 | F  | No  | NP                                                                                                                | 300  | neg | pos | pos | neg | neg                     | Diazepam<br>nordiazepam<br>oxazepam<br>lorazepam | Trimipramine<br>Promethazine                        | D    | CA |
|      | 60 | M  | No  | NP                                                                                                                | 210  | neg | neg | neg | neg | neg                     | Diazepam<br>Nordiazepam<br>Oxazepam              | Chlorprothixene                                     | D    | CA |
|      | 24 | F  | No  | NP                                                                                                                | 100  | neg | neg | neg | neg | neg                     | neg                                              | MDMA<br>Amphetamines                                | D    | CA |
|      | 37 | M  | No  | NP                                                                                                                | 2500 | neg | neg | neg | neg | neg                     | Diazepam<br>Nordiazepam                          | Tramadol<br>Venlafaxine                             | D    | CA |
|      | 29 | F  | Yes | NP                                                                                                                | 370  | neg | neg | neg | neg | neg                     | neg                                              | Buprenorphine<br>Doxepin<br>Melperone<br>Quetiapine | N, D | CA |
|      | 51 | M  | Yes | NP                                                                                                                | 410  | neg | pos | pos | neg | neg                     | Diazepam<br>Nordiazepam                          | neg                                                 | N, D | CA |
|      | 43 | M  | No  | NP                                                                                                                | 1400 | neg | neg | neg | neg | neg                     | neg                                              | neg                                                 | -    | CN |
|      | 38 | F  | No  | NP                                                                                                                | 220  | neg | pos | neg | pos | pos                     | neg                                              | Levopromazine                                       | D    | CA |
| 33   | M  | No | NP  | 3130                                                                                                              | neg  | neg | neg | neg | neg | Diazepam<br>Nordiazepam | neg                                              | D                                                   | CA   |    |
| 19   | F  | No | NP  | 740                                                                                                               | neg  | neg | neg | neg | pos | neg                     | THC                                              | D                                                   | CA   |    |

|    |   |     |    |  |       |     |     |     |     |     |                         | THC-COOH                                   |      |    |
|----|---|-----|----|--|-------|-----|-----|-----|-----|-----|-------------------------|--------------------------------------------|------|----|
| 23 | M | Yes | NP |  | 310   | neg | neg | neg | neg | neg | neg                     | Ethanol<br>THC<br>THC-COOH                 | N, D | CA |
| 24 | F | Yes | NP |  | 570   | neg | neg | neg | neg | neg | neg                     | neg                                        | N    | CA |
| 49 | M | No  | NP |  | 560   | neg | neg | neg | neg | neg | neg                     | neg                                        | -    | CN |
| 40 | M | No  | NP |  | 670   | neg | neg | neg | neg | pos | neg                     | neg                                        | D    | CA |
| 48 | M | Yes | NP |  | 330   | neg | neg | neg | neg | neg | Diazepam                | Doxepin                                    | N, D | CA |
| 36 | M | No  | NP |  | 310   | neg | neg | neg | neg | neg | neg                     | neg                                        | -    | CN |
| 25 | M | Yes | NP |  | 390   | neg | neg | neg | neg | neg | Diazepam<br>Nordiazepam | neg                                        | D    | CA |
| 29 | M | No  | NP |  | 380   | neg | neg | neg | neg | neg | neg                     | neg                                        | -    | CN |
| 19 | M | No  | NP |  | 530   | neg | neg | neg | neg | neg | Diazepam<br>Nordiazepam | Mirtazapine                                | D    | CA |
| 22 | F | No  | NP |  | 790   | neg | neg | neg | neg | pos | neg                     | neg                                        | D    | CA |
| 40 | M | No  | NP |  | 550   | neg | neg | neg | neg | neg | Diazepam<br>Nordiazepam | THC-COOH                                   | D    | CA |
| 46 | M | No  | NP |  | 990   | neg | neg | neg | neg | pos | Neg                     | neg                                        | D    | CA |
| 45 | M | No  | NP |  | 11580 | neg | neg | neg | neg | neg | Diazepam<br>Nordiazepam | neg                                        | D    | CA |
| 57 | M | No  | NP |  | 920   | neg | neg | neg | pos | pos | neg                     | neg                                        | D    | CA |
| 45 | M | No  | NP |  | 300   | neg | neg | neg | neg | neg | Diazepam<br>Nordiazepam | Doxepin                                    | D    | CA |
| 38 | F | No  | NP |  | 300   | neg | neg | neg | pos | pos | neg                     | neg                                        | D    | CA |
| 27 | M | Yes | NP |  | 60    | neg | neg | neg | neg | neg | Diazepam<br>Nordiazepam | Ethanol                                    | D    | CA |
| 36 | M | Yes | NP |  | 140   | neg | neg | neg | neg | neg | neg                     | Ethanol                                    | N, D | CA |
| 49 | M | Yes | NP |  | 60    | neg | neg | neg | neg | neg | neg                     | Ethanol                                    | N, D | CA |
| 27 | M | No  | NP |  | 350   | neg | neg | neg | neg | neg | Diazepam<br>Nordiazepam | Doxepin<br>Buprenorphine                   | D    | CA |
| 52 | F | No  | NP |  | 470   | neg | neg | neg | neg | neg | neg                     | Ethanol<br>Trimipramine<br>Nortrimipramine | D    | CA |
| 32 | M | No  | NP |  | 1080  | neg | neg | neg | pos | pos | neg                     | neg                                        | D    | CA |

|      |    |   |     |                                                                          |       |     |     |     |     |     |                                                  |                    |      |    |
|------|----|---|-----|--------------------------------------------------------------------------|-------|-----|-----|-----|-----|-----|--------------------------------------------------|--------------------|------|----|
| [42] | 41 | F | No  | NP                                                                       | 17000 | neg | neg | neg | neg | neg | neg                                              | neg                | -    | CN |
|      | 26 | M | Yes | L: bilateral bronchopneumonia with food aspiration                       | 700   | neg | neg | neg | neg | neg | neg                                              | neg                | N, P | CA |
|      | 45 | M | No  | L: bilateral bronchopneumonia<br>H: dilated cardiomyopathy with necrosis | 900   | neg | neg | neg | neg | neg | neg                                              | neg                | P, C | CA |
|      | 21 | M | No  | L: bilateral bronchopneumonia<br>H: rheumatic heart disease              | 500   | neg | neg | neg | neg | neg | neg                                              | neg                | P, C | CA |
|      | 33 | M | No  | H: hypertrophic cardiomyopathy, replaced mitral valve                    | 800   | neg | neg | neg | neg | neg | neg                                              | neg                | C    | CA |
|      | 28 | M | No  | L: bilateral bronchopneumonia<br>H: hypertrophic cardiomyopathy          | 600   | neg | neg | neg | neg | neg | neg                                              | neg                | P, C | CA |
|      | 44 | M | No  | L: pneumonia<br>H: hypertrophic cardiomyopathy                           | 700   | neg | neg | neg | neg | neg | neg                                              | neg                | P, C | CA |
|      | 41 | F | No  | L: pulmonary inflammation<br>H: acute myocardial ischemia                | 800   | neg | neg | neg | neg | neg | neg                                              | neg                | P, C | CA |
| [36] | 38 | M | No  | NP                                                                       | 1380  | neg | neg | neg | neg | neg | Diazepam<br>Nordiazepam                          | neg                | D    | CA |
|      | 30 | M | No  | NP                                                                       | 500   | neg | pos | neg | neg | neg | neg                                              | neg                | D    | CA |
|      | 24 | M | No  | NP                                                                       | 280   | neg | neg | neg | neg | neg | Bromazepam<br>Nordiazepam<br>7aminoflunitrazepam | Doxepin            | D    | CA |
|      | 39 | M | No  | NP                                                                       | 30    | neg | pos | neg | neg | pos | Diazepam<br>Temazepam                            | neg                | D    | CA |
|      | 41 | F | No  | NP                                                                       | 100   | neg | neg | neg | neg | neg | Nordiazepam                                      | Ethanol<br>Toxepin | D    | CA |
|      | 36 | F | Yes | NP                                                                       | 470   | neg | pos | neg | neg | neg | neg                                              | Paracetamol        | N, D | CA |
|      | 42 | M | Yes | NP                                                                       | 4070  | neg | neg | neg | neg | neg | neg                                              | neg                | N    | CA |
|      | 22 | M | No  | NP                                                                       | 330   | neg | neg | neg | neg | neg | Diazepam<br>Nordiazepam<br>Oxazepam<br>Temazepam | THC-COOH           | D    | CA |
|      | 29 | M | No  | NP                                                                       | 410   | neg | neg | neg | neg | neg | Diazepam<br>Oxazepam<br>Temazepam                | THC-COOH           | D    | CA |
|      | 36 | M | No  | NP                                                                       | 170   | neg | pos | neg | neg | neg | Diazepam<br>Nordiazepam                          | Ethanol<br>THC-OH  | D    | CA |

|    |   |     |    |      |     |     |     |     |     |     |                                     |                                                  |   |    |
|----|---|-----|----|------|-----|-----|-----|-----|-----|-----|-------------------------------------|--------------------------------------------------|---|----|
|    |   |     |    |      |     |     |     |     |     |     |                                     | THC-COOH<br>Tramadol<br>Carbamazepine            |   |    |
| 34 | M | Yes | NP | 260  | neg | neg | neg | neg | neg | neg | neg                                 | neg                                              | N | CA |
| 38 | M | No  | NP | 1350 | neg | neg | neg | neg | neg | neg | Diazepam<br>Nordiazepam<br>Oxazepam | neg                                              | D | CA |
| 32 | M | No  | NP | 170  | neg | neg | neg | neg | neg | neg | Bromazepam                          | Ethanol                                          | D | CA |
| 20 | M | No  | NP | 430  | neg | neg | neg | neg | neg | neg | Diazepam<br>Oxazepam<br>Bromazepam  | THC-COOH                                         | D | CA |
| 21 | M | No  | NP | 520  | neg | neg | neg | neg | neg | neg | neg                                 | THC-COOH                                         | D | CA |
| 24 | M | No  | NP | 90   | neg | neg | neg | neg | neg | neg | Diazepam<br>Nordiazepam             | THC-COOH<br>Amphetamine                          | D | CA |
| 38 | M | No  | NP | 90   | neg | neg | neg | neg | neg | neg | neg                                 | Ethanol                                          | D | CA |
| 19 | M | No  | NP | 170  | neg | neg | neg | neg | neg | neg | neg                                 | neg                                              | - | CN |
| 40 | M | No  | NP | 830  | neg | pos | neg | neg | neg | neg | Diazepam<br>Nordiazepam             | THC-COOH<br>Methamphetamine                      | D | CA |
| 20 | F | No  | NP | 210  | neg | neg | neg | neg | neg | neg | 7aminoflunitrazepam                 | Doxepin                                          | D | CA |
| 31 | M | No  | NP | 170  | neg | pos | neg | neg | neg | neg | neg                                 | Ethanol                                          | D | CA |
| 35 | M | No  | NP | 160  | neg | pos | neg | neg | neg | neg | neg                                 | Ethanol                                          | D | CA |
| 20 | M | No  | NP | 40   | neg | neg | neg | neg | neg | neg | Diazepam<br>Nordiazepam<br>Oxazepam | neg                                              | D | CA |
| 43 | M | No  | NP | 680  | neg | neg | neg | neg | neg | neg | Diazepam<br>Nordiazepam             | THC-COOH                                         | D | CA |
| 32 | M | No  | NP | 310  | neg | neg | neg | neg | neg | neg | Diazepam<br>Nordiazepam             | Ethanol<br>THC-COOH                              | D | CA |
| 18 | M | No  | NP | 70   | neg | neg | neg | neg | neg | neg | neg                                 | THC<br>THC-OH<br>THC-COOH<br>Amphetamine<br>MDMA | D | CA |

|       |    |   |     |                                                 |      |     |     |     |     |     |                                      |                                   |         |    |
|-------|----|---|-----|-------------------------------------------------|------|-----|-----|-----|-----|-----|--------------------------------------|-----------------------------------|---------|----|
|       | 28 | F | No  | NP                                              | 540  | neg | neg | neg | neg | neg | Diazepam<br>Nordiazepam              | neg                               | D       | CA |
|       | 28 | M | Yes | NP                                              | 280  | neg | neg | neg | pos | pos | Diazepam<br>Nordiazepam<br>Oxazepam  | neg                               | N, D    | CA |
|       | 22 | F | Yes | NP                                              | 390  | neg | neg | neg | neg | neg | Diazepam<br>Nordiazepam              | THC-COOH                          | N, D    | CA |
|       | 44 | M | No  | NP                                              | 1090 | neg | neg | neg | neg | neg | neg                                  | neg                               | -       | CN |
|       | 44 | M | No  | NP                                              | 2440 | neg | pos | neg | neg | neg | neg                                  | neg                               | D       | CA |
|       | 30 | M | No  | NP                                              | 180  | neg | neg | neg | neg | neg | neg                                  | neg                               | -       | CN |
|       | 26 | M | No  | NP                                              | 440  | neg | neg | neg | neg | neg | neg                                  | Ethanol                           | D       | CA |
|       | 42 | M | No  | NP                                              | 670  | neg | neg | neg | neg | neg | neg                                  | THC<br>THC-OH<br>THC-COOH         | D       | CA |
|       | 22 | M | No  | NP                                              | 30   | neg | neg | neg | neg | neg | Diazepam<br>Nordiazepam              | neg                               | D       | CA |
|       | 33 | M | No  | NP                                              | 270  | neg | pos | neg | neg | neg | Diazepam                             | Doxepin                           | D       | CA |
|       | 47 | M | Yes | NP                                              | 830  | neg | pos | neg | neg | neg | Diazepam                             | neg                               | N, D    | CA |
|       | 20 | M | No  | NP                                              | 200  | neg | neg | neg | neg | pos | neg                                  | neg                               | D       | CA |
| [96]  | 37 | F | No  | L: edema, congestion                            | 1400 | neg | pos | pos | neg | neg | Temazepam<br>Diazepam<br>Nordiazepam | Paracetamol                       | D       | CA |
| [98]  | 25 | M | Yes | L: edema, calcified granuloma<br>H: hypertrophy | 450  | neg | neg | neg | neg | neg | neg                                  | THC<br>Sertraline<br>Norsertaline | N, C, D | CA |
| [101] | 45 | M | No  | NP                                              | 230  | neg | neg | neg | neg | neg | neg                                  | Sertraline                        | D       | CA |
| [106] | 39 | M | No  | NP                                              | 510  | neg | neg | neg | neg | neg | Temazepam                            | Amitriptyline<br>Nortriptyline    | D       | CA |

**Table S3.** In house cases, with extracted data and classification.

N: number of the case.

Gender. F: female, M: male.

Post-mortem examination. H: heart; L: lung.

neg: no drug detected in blood; np: data not provided.

6-MAM: 6-monoacetylmorphine; BEG: benzoylecgonine; BZDs: benzodiazepine; EDDP: 2-Ethylidene-1,5-dimethyl-3,3-diphenylpyrrolidine.

Other drugs. THC: tetrahydrocannabinol; THC-COOH: tetrahydrocannabinol carboxylic acid.

D: drugs; N: naïve/non-tolerant; P: pulmonary; C: cardiac.

CN: controls. CA: cases

| N. | Year | Age | Gender | Naive/non tolerant | Post-mortem examination                                                                                                                         | Metadone (ng/mL) | 6-MAM | Morphine | Codeine | Cocaine | BEG | EDDP | BZDs | Other drugs                                             | Disease or condition | Group |
|----|------|-----|--------|--------------------|-------------------------------------------------------------------------------------------------------------------------------------------------|------------------|-------|----------|---------|---------|-----|------|------|---------------------------------------------------------|----------------------|-------|
| 1  | 2007 | 32  | M      | No                 | Past flebitis, fresh injection marks<br>L: 1560 g, pulmonary edema<br>H: 420g                                                                   | 48               | neg   | neg      | neg     | neg     | pos | pos  | neg  | Ethanol                                                 | D                    | CA    |
| 2  | 2008 | 42  | M      | No                 | Fresh injection marks<br>L: edema, mild emphysema<br>H: 550g but with no abnormality                                                            | 1040             | neg   | neg      | neg     | neg     | neg | neg  | neg  | neg                                                     | -                    | CN    |
| 3  | 2009 | 52  | M      | No                 | Fresh injection marks<br>L: 1490g, bilateral edema<br>H: 420g                                                                                   | 1400             | neg   | neg      | neg     | neg     | neg | pos  | neg  | neg                                                     | -                    | CN    |
| 4  | 2009 | 41  | M      | No                 | Fresh injection marks<br>L: 1820g, hemorrhagic edema, congestion, anthracosis<br>H: 460g, focal areas of sclerosis with normal myocardial cells | 550              | neg   | neg      | neg     | pos     | pos | pos  | neg  | Promazine<br>Lidocaine<br>Phenacetin                    | D                    | CA    |
| 5  | 2009 | 31  | M      | Yes                | Fresh injection mark<br>L: 1480g, 730g, hemorrhagic edema<br>H: 450g, mild increase in connective tissue                                        | 450              | neg   | pos      | neg     | neg     | neg | neg  | neg  | Ethanol 0.12                                            | N, D                 | CA    |
| 6  | 2010 | 49  | M      | No                 | Past injection marks<br>H: 420g<br>L: 1760g, hemorrhagic edema                                                                                  | 791              | neg   | pos      | neg     | neg     | neg | pos  | neg  | neg                                                     | D                    | CA    |
| 7  | 2010 | 34  | M      | No                 | Past and fresh multiple injection marks<br>L: 1530g, hemorrhagic edema, peribronchial inflammation<br>H: 500g, no abnormality                   | 433              | neg   | pos      | neg     | pos     | pos | pos  | neg  | Phenacetine<br>Paracetamol<br>Levamisole<br>Venlafaxine | D, P                 | CA    |
| 8  | 2010 | 40  | M      | Yes                | Fresh injection mark<br>L: 1410g, hemorrhagic edema, chronic inflammation                                                                       | 32               | neg   | pos      | neg     | neg     | neg | neg  | neg  | Paracetamol<br>Theophylline                             | N, D, P, C           | CA    |

|    |      |    |   |     |                                                                                                                                                                                           |      |     |     |     |     |     |     |     |                                                                    |         |    |  |  |
|----|------|----|---|-----|-------------------------------------------------------------------------------------------------------------------------------------------------------------------------------------------|------|-----|-----|-----|-----|-----|-----|-----|--------------------------------------------------------------------|---------|----|--|--|
|    |      |    |   |     | H: 360g, edema, myocardial sclerosis and inflammation                                                                                                                                     |      |     |     |     |     |     |     |     |                                                                    |         |    |  |  |
| 9  | 2010 | 37 | M | No  | Multiple past injection mark<br>L: 1400g, hemorrhagic edema, congestion, chronic inflammation<br>H: 340g, wavy myocardial fibers, edema                                                   | 338  | neg | neg | neg | pos | pos | pos | neg | Ecgonine methyl ester                                              | D, P, C | CA |  |  |
| 10 | 2010 | 35 | M | No  | Fresh injection mark. Past pneumonia.<br>L: 1690g, hemorrhagic edema, diffuse lymphomonocytic inflammation<br>H: 460g, edema, myocardial sclerosis, adipose tissue at the right ventricle | 1250 | neg | neg | neg | neg | neg | pos | neg | Ethanol 0.89<br>Valproate<br>Paracetamol                           | D, P, C | CA |  |  |
| 11 | 2010 | 26 | M | No  | L: 1600g, edema, bronchopneumonia<br>H: 350g                                                                                                                                              | 455  | neg | neg | neg | neg | neg | pos | neg | neg                                                                | P       | CA |  |  |
| 12 | 2011 | 41 | M | No  | Fresh injection marks<br>L: 940g hemorrhagic dissociation and emphysema<br>H: 320g                                                                                                        | 495  | neg | neg | neg | pos | pos | pos | neg | Ecgonine methyl ester                                              | D, P    | CA |  |  |
| 13 | 2012 | 27 | M | No  | Multiple past injection marks<br>L: 1505g, hemorrhagic edema<br>H: 300 g, edema                                                                                                           | 270  | pos | pos | pos | neg | neg | pos | neg | neg                                                                | D       | CA |  |  |
| 14 | 2013 | 53 | F | No  | Multiple past injection marks<br>L: 1270g, hemorrhagic edema<br>H: 240g mild coronarosclerosis                                                                                            | 5200 | neg | neg | neg | neg | neg | pos | neg | Ethanol 2.4                                                        | D       | CA |  |  |
| 15 | 2013 | 32 | M | No  | Fresh injection marks<br>L: 1900g, 880g, hemorrhagic edema, emphysema, bilateral bronchopneumonia<br>H: 440g, severe myocardial sclerosis involving both ventricles, myocardial disarray  | 209  | neg | neg | neg | pos | pos | pos | neg | Ecgonine methyl ester<br>Levamisole<br>Methylecgonine<br>Cinnamate | D, P, C | CA |  |  |
| 16 | 2014 | 25 | F | No  | L: 1400g, edema, congestion<br>H: 246g                                                                                                                                                    | 3350 | neg | neg | neg | neg | neg | pos | neg | neg                                                                | -       | CN |  |  |
| 17 | 2014 | 46 | M | No  | L: 1680g, hemorrhagic edema, bronchopneumonia<br>H: 400g, edema                                                                                                                           | 517  | neg | neg | neg | pos | pos | pos | neg | Ethanol 0.49<br>Ecgonine methyl ester<br>Levamisole                | D, P    | CA |  |  |
| 18 | 2014 | 44 | M | No  | Nasal mucosa atrophy<br>L: 1980g, hemorrhagic edema, bilateral bronchopneumonia<br>H: 390g, right ventricle myocardial sclerosis, disarray with wavy fibers in the left ventricle         | 122  | neg | neg | neg | pos | pos | pos | neg | Ethanol 0.1<br>Ecgonine methyl ester<br>Methotrimeprazine          | D, P, C | CA |  |  |
| 19 | 2014 | 26 | M | No  | L: 2010g, 910g, hemorrhagic edema, bronchopneumonia<br>H: 485g myocardial necrosis with myocarditis and pericarditis with lymphogranulocytic inflammation                                 | 158  | neg | neg | neg | pos | pos | pos | neg | Ethanol 0.1                                                        | D, P, C | CA |  |  |
| 20 | 2014 | 26 | F | Yes | L: 1300g, hemorrhagic edema<br>H: 265g, wavy myofibers, sclerosis of papillary muscles                                                                                                    | 25   | neg | neg | neg | pos | pos | pos | neg | Ethanol 0.1,<br>Paracetamol                                        | N, D, C | CA |  |  |
| 21 | 2014 | 43 | F | No  | Fresh injection mark<br>L: 1240g, hemorrhagic edema<br>H: 450g                                                                                                                            | 3990 | neg | pos | pos | neg | neg | neg | neg | Ethanol 2.35                                                       | D       | CA |  |  |



|    |      |    |   |     |                                                                                                                                                                 |      |     |     |     |     |     |     |                                                                |                                                                                    |            |               |    |
|----|------|----|---|-----|-----------------------------------------------------------------------------------------------------------------------------------------------------------------|------|-----|-----|-----|-----|-----|-----|----------------------------------------------------------------|------------------------------------------------------------------------------------|------------|---------------|----|
| 22 | 2015 | 44 | M | No  | Multiple past injection marks and phlebitis<br>L: 1700g, hemorrhagic edema<br>H: 480g, sclerosis myocardial disarray at the septum, wavy myofibers              | 1450 | neg | pos | pos | pos | pos | pos | neg                                                            | Ethanol 0.1,<br>Ecgonine methyl ester<br>Fluconazole<br>Levamisole<br>Trimethoprim | D, C       | CA            |    |
| 23 | 2016 | 38 | M | No  | Past injection marks and skin necrosis<br>L: 1240g, hemorrhagic edema<br>H: 315g focal severe sclerosis                                                         | 454  | neg | neg | neg | neg | pos | pos | neg                                                            | Ethanol 0.1                                                                        | D, C       | CA            |    |
| 24 | 2016 | 42 | M | No  | Past and fresh injection marks<br>L: hemorrhagic edema<br>H: perivascular sclerosis                                                                             | 460  | neg | neg | neg | pos | pos | neg | neg                                                            | Ethanol 0.1                                                                        | D, C       | CA            |    |
| 25 | 2016 | 47 | M | No  | L: 1650g, edema, bilateral bronchopneumonia<br>H: 400g, wavy myofibers, neutrophils inflammation, lymphomonocytic miopericarditis of both ventricles, sclerosis | 187  | neg | neg | neg | neg | neg | pos | Delorazepam<br>Lorazepam                                       | Clorpromazine<br>Clotiapine<br>Clozapine                                           | D, P,<br>C | CA            |    |
| 26 | 2016 | 19 | M | Yes | Fresh injection marks<br>L: 2060g, hemorrhagic edema, endoalveolar inflammation<br>H: 400g, interstitial edema                                                  | 77   | neg | neg | neg | neg | neg | pos | neg                                                            | neg                                                                                | N, P       | CA            |    |
| 27 | 2017 | 18 | M | No  | L: 1260g<br>H: 380g                                                                                                                                             | 3190 | neg | neg | neg | neg | neg | neg | neg                                                            | neg                                                                                | neg        | -             | CN |
| 28 | 2018 | 48 | F | No  | L: 1780g, hemorrhagic edema<br>H: 320g                                                                                                                          | 2392 | neg | neg | neg | neg | pos | pos | neg                                                            | neg                                                                                | neg        | D             | CA |
| 29 | 2018 | 19 | F | Yes | L: 640g, hemorrhagic edema, multiple lymphocytic foci<br>H: 210g                                                                                                | 82   | neg | neg | neg | neg | neg | pos | Alprazolam                                                     | Ethanol 0.1                                                                        | N, D,<br>P | CA            |    |
| 30 | 2018 | 43 | M | No  | L: 1250g, severe hemorrhagic edema, mild emphysema<br>H: 540g, confluent myocardial sclerosis                                                                   | 716  | neg | neg | neg | neg | neg | pos | Alprazolam<br>Diazepam<br>Lorazepam<br>Nordiazepam<br>Oxazepam | Ethanol 0.1<br>Mirtazapine                                                         | C, D       | CA            |    |
| 31 | 2019 | 17 | M | Yes | L: 1606g, hemorrhagic edema, bronchopneumonia<br>H: 324g, septic emboli, wavy myofibers at septum and right ventricle                                           | 122  | neg | neg | neg | pos | pos | pos | neg                                                            | neg                                                                                | neg        | N, D,<br>P, C | CA |
| 32 | 2019 | 47 | M | No  | L: 2000g, 950g, edema, peribronchial inflammation, emphysema<br>H: 420g                                                                                         | 117  | neg | neg | neg | neg | pos | pos | neg                                                            | THC-COOH                                                                           | D, P       | CA            |    |
| 33 | 2019 | 26 | F | Yes | L: 960g, hemorrhagic edema<br>H: 310g                                                                                                                           | 1209 | neg | neg | neg | pos | pos | pos | neg                                                            | Cocaethylene<br>Ephedrine                                                          | N, D       | CA            |    |
| 34 | 2020 | 28 | F | Yes | L: 1080g, congestion, edema<br>H: 290g, mild myocardial suffering, edema                                                                                        | 645  | neg | neg | neg | pos | pos | pos | neg                                                            | neg                                                                                | neg        | N, D          | CA |
| 35 | 2020 | 44 | F | No  | L: 1020g, multiple foci of bronchopneumonia, hemorrhagic edema, anthracosis, emphysema<br>H: 253g, advanced sclerosis                                           | 451  | neg | neg | neg | neg | neg | pos | Lorazepam                                                      | neg                                                                                | D, P,<br>C | CA            |    |
